1 **The depletion mechanism can actuate bacterial aggregation by self-produced**  
2 **exopolysaccharides and determine species distribution and composition in bacterial**  
3 **aggregates**

4

5 Patrick R. Secor<sup>1\*</sup>, Lia A. Michaels<sup>1</sup>, DeAnna C. Bublitz<sup>1</sup>, Laura K. Jennings<sup>1</sup>, Pradeep K.  
6 Singh<sup>2</sup>

7

8 <sup>1</sup>Division of Biological Sciences, University of Montana, Missoula, MT

9 <sup>2</sup>Department of Microbiology, University of Washington, Seattle, WA

10 \*Corresponding author, [Patrick.secor@mso.umt.edu](mailto:Patrick.secor@mso.umt.edu)

11 **Abstract**

12

13 Bacteria causing chronic infections are often found in cell aggregates suspended in polymer  
14 secretions, and aggregation may be a factor in infection persistence. One aggregation  
15 mechanism, called depletion aggregation, is driven by physical forces between bacteria and  
16 polymers. Here we investigated whether the depletion mechanism can actuate the aggregating  
17 effects of *P. aeruginosa* exopolysaccharides for suspended (i.e. not surface attached) bacteria,  
18 and how depletion affects bacterial inter-species interactions. We found cells overexpressing the  
19 exopolysaccharides Pel and Psl, but not alginate remained aggregated after depletion-mediating  
20 conditions were reversed. In co-culture, depletion aggregation had contrasting effects on *P.*  
21 *aeruginosa*'s interactions with coccus- and rod-shaped bacteria. Depletion caused *S. aureus*  
22 (cocci) and *P. aeruginosa* (rods) to segregate from each other, *S. aureus* to resist secreted *P.*  
23 *aeruginosa* antimicrobial factors, and the species to co-exist. In contrast, depletion aggregation  
24 caused *P. aeruginosa* and *Burkholderia sp.* to intermix, enhancing type VI secretion inhibition of  
25 *Burkholderia* by *P. aeruginosa*, leading to *P. aeruginosa* dominance. These results show that in  
26 addition to being a primary cause of aggregation in polymer-rich suspensions, physical forces  
27 inherent to the depletion mechanism can actuate the aggregating effects of self-produced  
28 exopolysaccharides and determine species distribution and composition of bacterial  
29 communities.

## 30 Introduction

31

32 At sites of chronic infection, bacteria are often found within cell aggregates suspended in  
33 polymer-rich host secretions such as mucus, pus, sputum and others (1-3). Aggregated growth is  
34 thought important because it can increase the ability of bacteria to survive environmental stresses  
35 such as pH and osmotic extremes, as well as host-derived and pharmaceutical antimicrobials (4,  
36 5). Bacterial aggregation also affects disease-relevant phenotypes such as bacterial invasiveness,  
37 virulence factor production, and resistance to phagocytic uptake (6-10).

38

39 Bacteria can aggregate via bridging aggregation, which occurs when adhesions, polymers, or  
40 other molecules bind cells to one another. Another general yet underappreciated mechanism is  
41 depletion aggregation (11). Depletion aggregation occurs in environments containing high  
42 concentrations of non-adsorbing polymers (12, 13). Such conditions exist in the cytoplasm of  
43 eukaryotic cells (11), cystic fibrosis airways (14), wounds (15), biofilm matrices (16), and others  
44 settings. Depletion aggregation is initiated when bacteria spontaneously come into close contact  
45 with each other (**Fig 1A**), causing the polymers in between cells to become restricted in their  
46 configurational freedom, and thus decreasing their entropy. When polymers spontaneously move  
47 out from in between bacterial cells (17) a polymer concentration gradient is established across  
48 adjacent bacterial cells, producing an osmotic imbalance (i.e., the depletion force) that physically  
49 holds the aggregate together (**Fig 1B and C**) (18).

50

51 While definitions and terminology can vary among investigators, biofilm formation and  
52 depletion aggregation can be differentiated by two factors. First, biofilms are generally  
53 considered a phenomenon of surface-attached bacteria (19-23), whereas depletion aggregation  
54 operates on cells suspended in polymer solutions. Second, biofilm formation is driven by  
55 bacterial activity (19, 21, 23) whereas depletion aggregation is a consequence of physical forces  
56 generated when high concentrations of polymers are present. If bacteria and polymer  
57 concentrations are high enough, aggregation via depletion will occur as default and obligatory  
58 outcome unless mechanisms like mechanical disruption or bacterial motility produce stronger  
59 counteracting forces. The dependency on environmental conditions also means that a reduction

60 in polymer concentration will cause aggregate to disperse, unless other mechanism of bacterial  
61 adhesion supervene.

62  
63 Previous work has shown that the concentrations host-derived polymers like mucin, DNA, and  
64 F-actin found at infection sites cause bacterial depletion aggregation (as do model polymers like  
65 PEG), that and that depletion aggregation causes bacteria an antibiotic-tolerant phenotype (14).  
66 Here we investigated how the depletion mechanism affects aggregation mediated by *P.*

67 *aeruginosa*'s biofilm exopolysaccharides and recently identified in cystic fibrosis sputum. We  
68 also investigated how depletion aggregation affects the interactions between bacterial species  
69 that may co-exist *in vivo*.

70  
71

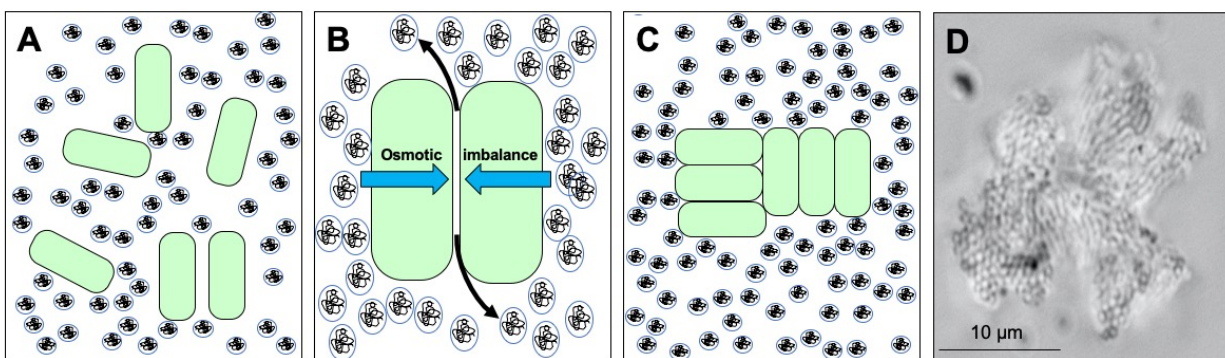

**Figure 1. Depletion aggregation is an entropic mechanism that operates to aggregate bacterial cells in environments crowded with non-adsorbing polymers. (A)** Bacterial cells (green) are suspended in an environment with high concentrations of non-adsorbing polymer (circles). **(B)** Polymers in between cells are restricted in their conformational freedom and spontaneously move out from in between cells (black arrows), increasing their entropy. The polymer concentration gradient across the cells produces an osmotic imbalance (blue arrows). **(C)** The osmotic imbalance (i.e., the depletion force) physically holds the cells together in aggregates. **(D)** Representative image of a *P. aeruginosa* PAO1 depletion aggregate with PEG 35 kDa as the polymer.

72  
73

## 74 Results

75

76 **Depletion aggregation can actuate bridging interactions by exopolysaccharides.** Biofilm  
77 formation is generally thought to occur when surface-attached cells accumulate by growth,  
78 moving towards each other, or recruitment from overlying media; and produce  
79 exopolysaccharides and other matrix components that enable them to stick together via bridging  
80 interactions (24, 25). Unlike surface-attached cells, bacteria suspended in solutions are subject to

81 random (i.e. Brownian) movement or fluid flows that can disperse them, reducing cell to cell  
82 contact and the potential for bridging interactions. These points led us to hypothesize that in  
83 addition to being a primary aggregation mechanism, the depletion mechanism could facilitate  
84 bridging interactions mediated by biofilm matrix components.

85  
86 *P. aeruginosa* encodes three exopolysaccharides. Pel is a cationic polymer composed of partially  
87 acetylated N-acetylgalactosamine and N-acetylglucosamine (26), Psl is a neutral polymer  
88 containing glucose, mannose, and rhamnose (27), and alginate is a negatively-charged polymer  
89 composed of mannuronic and guluronic acid (28, 29). We first tested wild-type *P. aeruginosa*  
90 that are capable of producing all of these three exopolysaccharides (30, 31). As seen previously,  
91 wild type *P. aeruginosa* exposed to the model polymer PEG 35 kDa rapidly aggregated via the  
92 depletion mechanism, and immediately diluting the polymer by adding PBS caused the  
93 aggregates to disperse whereas adding additional PEG did not. As noted above, reversibility with  
94 dilution is a hallmark of depletion aggregation, as it is driven by crowding effects of  
95 environmental polymers.

96  
97 We reasoned that longer aggregation time periods could enable wild type *P. aeruginosa* to  
98 produce biofilm exopolysaccharides and adhesive bridging interactions. However,  
99 disaggregation of wild-type *P. aeruginosa* was noted even in aggregates that were held together  
100 by polymer exposure for 18 hrs (**Fig 2A; Movie 1**). To determine if high level expression of  
101 exopolysaccharides could cause depletion-induced aggregates to persist after polymer dilution  
102 we repeated these experiments using *P. aeruginosa* overproducing alginate (due to a mutation in  
103 alginate regulator, *muca*) and Pel and Psl (due to induced expression from a  $P_{BAD}$  promoter). *P.*  
104 *aeruginosa* over-expressing Pel and Psl remained aggregated after PBS (or PEG) dilution (**Fig**  
105 **2B and C**), whereas the strain over producing alginate did not (**Fig 2D**).

106  
107 We also studied clinical isolates taken from cystic fibrosis patients (32) that are known to  
108 overexpress Pel, Psl, or alginate. All 10 *P. aeruginosa* CF clinical isolates tested that over-  
109 produced the exopolysaccharides Psl or Pel (6, 33) formed dilution-resistant depletion aggregates  
110 (**Fig 2E, Table 1**), consistent with observations in corresponding engineered lab strains. In  
111 contrast, all (9/9) alginate-overproducing clinical isolates (i.e. mucoid strains) had a reversible

112 aggregation phenotype (Fig 2F, Table 1), consistent with observations with the mucoid PAO1  
113 *mucA22*. Collectively, these results indicate that under the conditions tested, Pel and Psl can  
114 stabilize aggregates formed by the depletion mechanism if they are highly expressed while  
115 alginate does not. The different chemical compositions or other physical properties such as  
116 charge may explain differences in aggregate reversibility.  
117

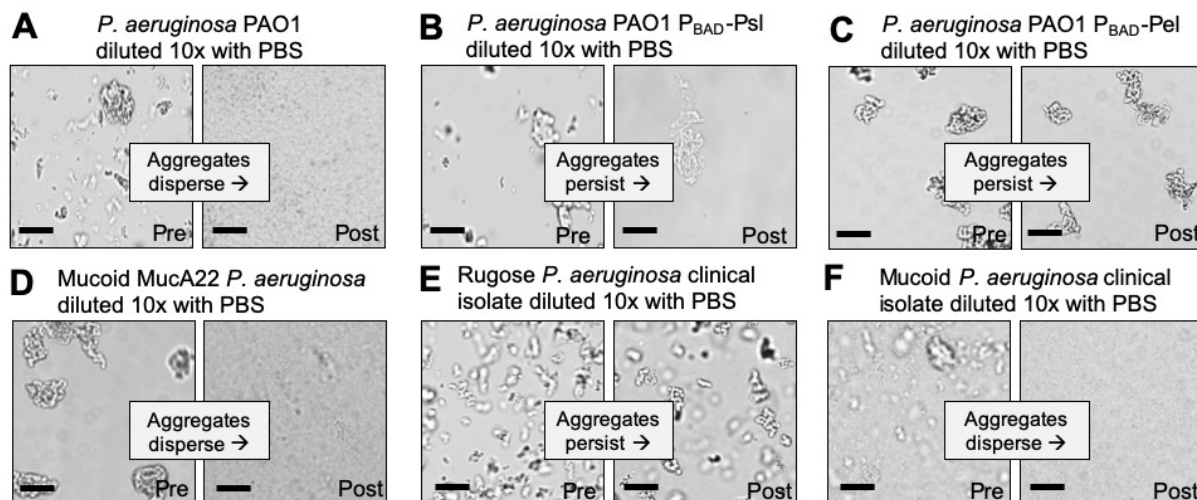

**Figure 2. Depletion aggregate dispersal phenotypes of *P. aeruginosa* laboratory strains and CF clinical isolates.** (A-F) Aggregate dispersal of the indicated strains and isolates was measured. Depletion aggregation was induced with 30% w/vol PEG 35 kDa for 18 hours. Depletion aggregates were then diluted 10X with PBS and representative images were acquired immediately pre- and immediately post-dilution. See also Figure S1 and Movie S1. Scale bar 40 μm.

118

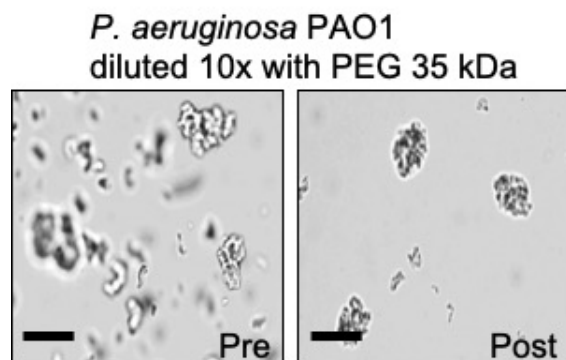

**Figure S1.** Depletion aggregation was induced with 30% w/vol PEG 35 kDa for 18 hours. *P. aeruginosa* PAO1 Depletion aggregates were then diluted 10X with additional PEG 35 kDa. Scale bar 40 μm.

119



120

**Table 1. *P. aeruginosa* morphology and aggregate reversibility phenotypes.**

| <b>Strain</b>                          | <b>Morphology</b> | <b>Reversible aggregation?</b> |
|----------------------------------------|-------------------|--------------------------------|
| PAO1                                   | Non-mucoid        | Yes                            |
| PAO1 $\Delta wspF/pslD$ ;<br>pBAD::Pel | Non-mucoid        | No                             |
| PAO1 $\Delta wspF/pelF$ ;<br>pBAD::Psl | Non-mucoid        | No                             |
| PDO300 mucA22                          | Mucoid            | Yes                            |
| PAO1 $\Delta mucA$                     | Mucoid            | Yes                            |
| Clinical Isolate 2-6.3                 | Mucoid            | Yes                            |
| Clinical Isolate 29-14                 | Mucoid            | Yes                            |
| Clinical Isolate 7-15.4                | Mucoid            | Yes                            |
| Clinical Isolate 9-19.6A               | Mucoid            | Yes                            |
| Clinical Isolate W1                    | Mucoid            | Yes                            |
| Clinical Isolate W2                    | Mucoid            | Yes                            |
| Clinical Isolate W3                    | Mucoid            | Yes                            |
| Clinical Isolate W4                    | Mucoid            | Yes                            |
| Clinical Isolate W5                    | Mucoid            | Yes                            |
| Clinical Isolate 27-6.4                | Rugose            | No                             |
| Clinical Isolate 28-17.9               | Rugose            | No                             |
| Clinical Isolates 29-5.6               | Rugose            | No                             |
| Clinical Isolate 14-4.2                | Rugose            | No                             |
| Clinical Isolate 17-6.6                | Rugose            | No                             |
| Clinical Isolate S1                    | Rugose            | No                             |
| Clinical Isolate S2                    | Rugose            | No                             |
| Clinical Isolate S3                    | Rugose            | No                             |
| Clinical Isolate S4                    | Rugose            | No                             |
| Clinical Isolate S5                    | Rugose            | No                             |

121

122 **Cell shape determines species distribution in depletion aggregates.** Theory predicts that  
123 bacteria aggregated by the depletion mechanism will be arranged to minimize the amount of  
124 volume occupied, as efficient packing will increase the space available for polymers and  
125 concomitant entropy gains. This effect should cause bacteria with similar shapes to be arranged  
126 together, and bacterial with different shapes to separated, unless bacterial activity intervenes. To  
127 test this hypothesis, we mixed *P. aeruginosa*, *Burkholderia cenocepacia*, *Escherichia coli* (rods)

128 and *Staphylococcus aureus* (a coccus) bearing different florescent labels in various combinations  
129 in PEG 35 kDa, and examined species distribution by microscopy.

130  
131 Polymer-mediated depletion aggregation caused cocci shaped species (*S. aureus*) to segregate  
132 from rods (*P. aeruginosa* and *B. cenocepacia*). In some cases, entire aggregates appeared  
133 composed of single species. In other cases, sections of mixed-species aggregates were composed  
134 primarily of either the rod or cocci-shaped species (**Fig 3A and B**). In contrast, depletion  
135 aggregation caused bacteria with similar cell shapes (i.e. differentially labeled *P. aeruginosa*  
136 with *P. aeruginosa*, or *P. aeruginosa* with *E. coli*) to intermix (**Fig 3C and D**). Similar results  
137 were seen using mixtures of formalin-killed *P. aeruginosa* and *S. aureus*, and formalin-killed *P.*  
138 *aeruginosa* and 2  $\mu\text{m}$  diameter spherical beads similarly sized as *S. aureus* (**Fig S2A and B**).  
139 These experiments, along with previous work using inert particles (34), show that physical forces  
140 mediating depletion aggregation cause like-shaped bacteria to intermix, and differently shaped  
141 bacteria to separate. The physical arrangement of bacterial species in aggregates can affect  
142 competitive and cooperative interactions (see below).

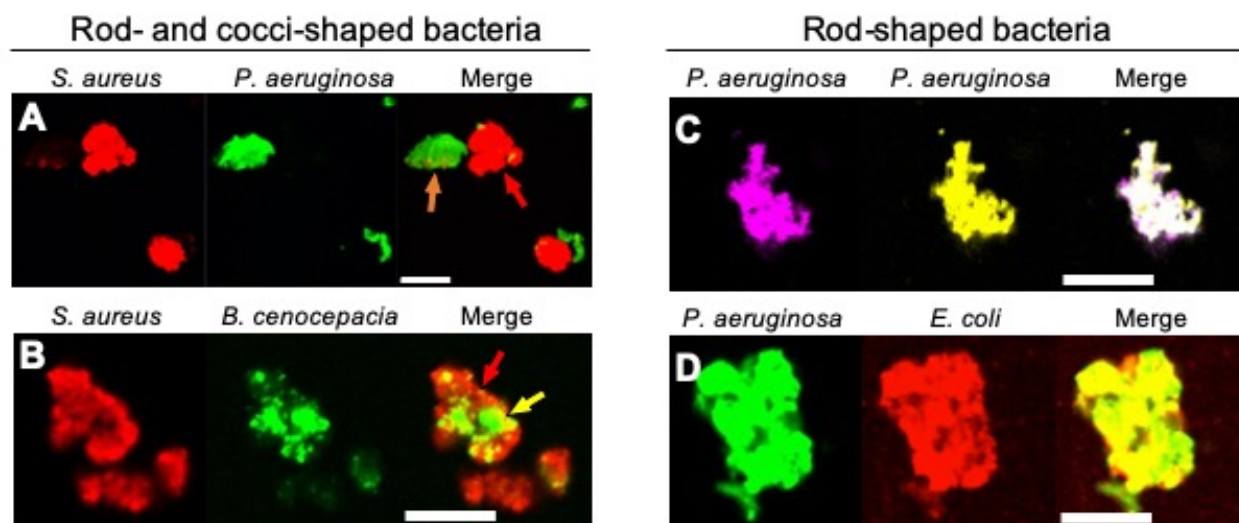

**Figure 3. Depletion aggregation spontaneously segregates bacteria with different cell shapes.** Equal numbers of the indicated species were mixed prior to the addition of PEG 35 kDa to induce depletion aggregation. Aggregates were imaged 18-h later. Combinations of rod- and cocci-shaped bacteria are shown in (A and B) and combinations of rod-shaped bacteria are shown in (C and D). Scale bar 30  $\mu\text{m}$ .

143



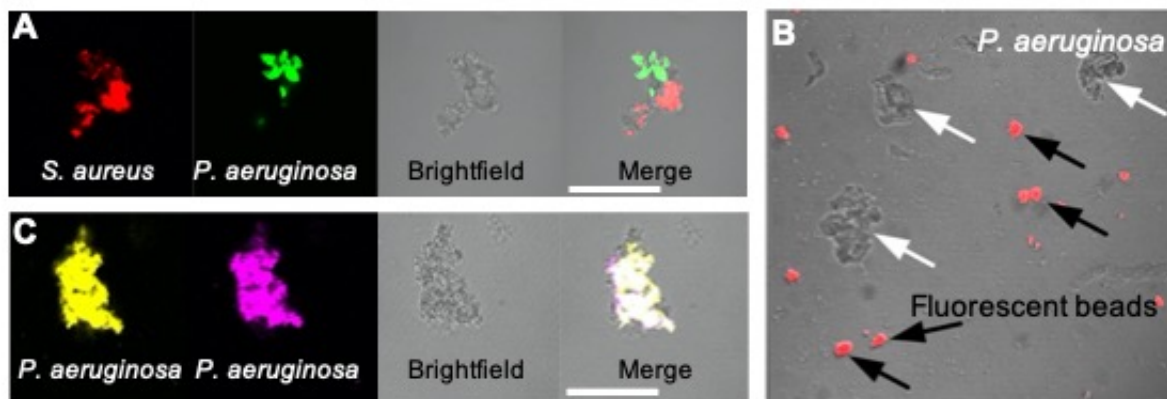

**Figure S2. Depletion aggregation operates on dead cells and inert latex beads.**

Depletion aggregation was induced with 30% w/vol PEG 35 kDa using combinations of dead formalin-fixed cocci and rods (A) or rods and rods (C). Fluorescent microscopy was used to image aggregates after 18-h of growth. Note species segregation in (A) (rod+cocci) but not in C (rod+rod). Bar, 30  $\mu$ m. (B) *P. aeruginosa* (white arrows) and fluorescent spherical latex beads (2  $\mu$ m diameter, black arrows) were aggregated using 30% w/vol PEG 35 kDa for 18-h and imaged using fluorescent and brightfield microscopy. Bar, 30  $\mu$ m.

144

145

146 **Depletion aggregation promotes antimicrobial tolerance in *S. aureus*.** Our finding that  
147 depletion aggregations can determine the physical arrangement of species led us to investigate its  
148 effects on interspecies interactions. *P. aeruginosa* and *S. aureus* are often co-isolated from CF  
149 airways (35, 36) and wounds (37, 38) for long durations. However, in laboratory co-cultures, *P.*  
150 *aeruginosa* rapidly inhibits *S. aureus* by quorum-regulated antimicrobials such as rhamnolipids,  
151 hydrogen cyanide, phenazines, quinolones, and others (39-43). Because aggregation can increase  
152 antimicrobial tolerance (44, 45), we hypothesized that depletion aggregation could enhance the  
153 ability of *S. aureus* to co-exist with *P. aeruginosa*.

154

155 Similar to previous studies, (39-43) we found that wild-type *P. aeruginosa* severely inhibited *S.*  
156 *aureus* in non-aggregated broth co-cultures (Fig 4A), and inhibition was diminished if *P.*  
157 *aeruginosa*'s main quorum sensing systems were genetically inactivated (i.e.  $\Delta$ *lasR/rhlR* PAO1;  
158  $p < 0.01$ ) (Fig 4A, compare white bars). However, in co-cultures exposed to PEG 35 kDa to  
159 induce depletion aggregation, wild-type *P. aeruginosa* killing of *S. aureus* was reduced by over  
160 10-fold (Fig 4A, black bars).

161

162 Our previous finding that depletion aggregation caused marked antibiotic tolerance in *P.*  
163 *aeruginosa* (14) led us to hypothesize that depletion-mediated tolerance explained *P.*  
164 *aeruginosa*-*S. aureus* co-existence in aggregates. We tested this by exposing dispersed and  
165 depletion-aggregated *S. aureus* to filter-sterilized culture *P. aeruginosa* supernatant found that  
166 dispersed *S. aureus* were ~10-fold more sensitive to killing after 18 hrs (**Fig 4B**). Control  
167 experiments indicate that PEG did not diminish the antimicrobial activity of *P. aeruginosa*  
168 supernatants (see **Fig S3**), and that the inhibitory effects were mediated by quorum-controlled  
169 factors (**Fig 4C**). These results indicate that depletion aggregation can promote co-existence of  
170 *P. aeruginosa* and *S. aureus* by enhancing *S. aureus* tolerance to quorum-controlled  
171 antimicrobials secreted by *P. aeruginosa*.  
172

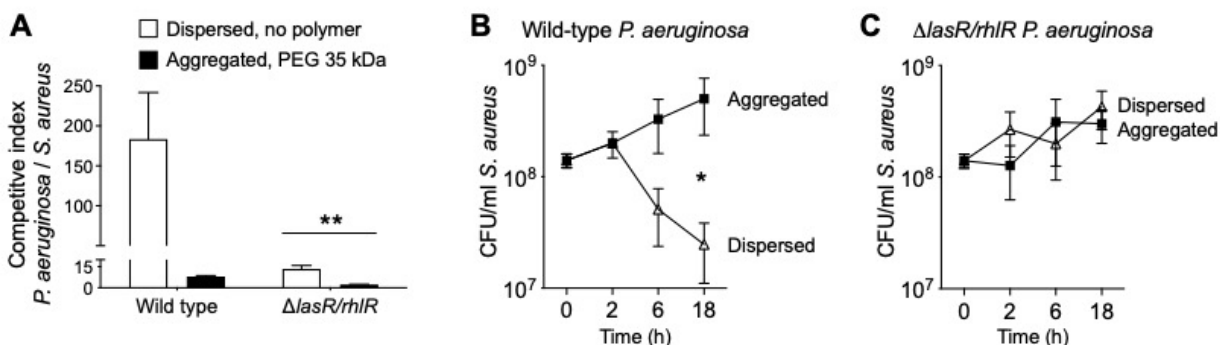

**Figure 4. Depletion aggregation increases *S. aureus* tolerance to antimicrobials secreted by *P. aeruginosa*.** (A) Equal numbers ( $10^7$  CFUs) of *S. aureus* and *P. aeruginosa* (wild-type PAO1 or  $\Delta lasR/rhlR$ ) were cocultured in LB supplemented with 30% w/vol PEG 35 kDa where indicated. After 18-h, viable bacteria were enumerated by serial dilution and plating and plotting the competitive index (change [final/initial] in *P. aeruginosa* vs. *S. aureus* CFUs). Results are the mean  $\pm$  SD, N=3 for each condition; \*\*p<0.01 relative to wild type. (B and C) *S. aureus* ( $10^8$  CFU/ml) was added to filter sterilized supernatants collected from wild-type or  $\Delta lasR/rhlR$  *P. aeruginosa* overnight cultures supplemented with 30% w/vol PEG 35 kDa where indicated. Viable *S. aureus* was enumerated by serial dilution and plating at the indicated times. Results are the mean  $\pm$  SD, N=3 for each condition and timepoint; \*p<0.02.

173

174

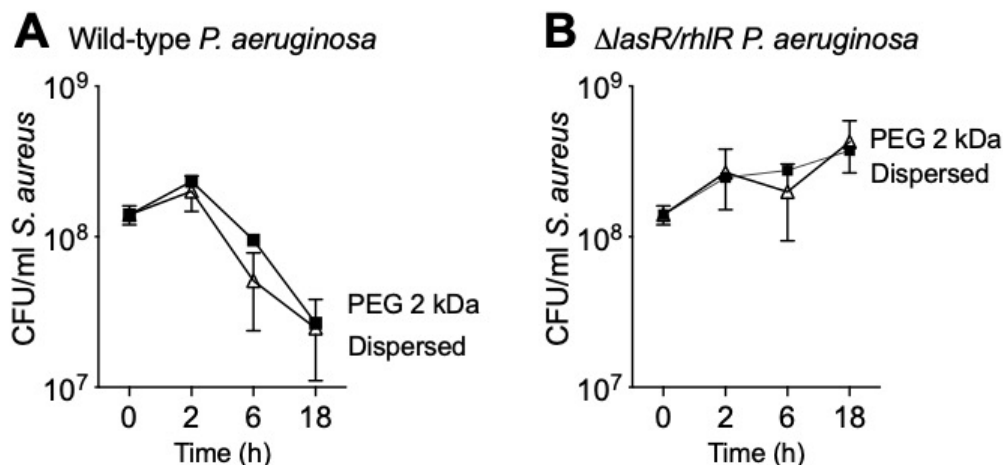

**Figure S3. PEG does not inactivate antimicrobials present in *P. aeruginosa* supernatants.** One possible explanation for the reduced killing of aggregated *S. aureus* (see Fig 4) was that PEG somehow inactivated antimicrobials present in wild-type *P. aeruginosa* supernatants. To address this possibility, we used a lower molecular weight PEG (PEG 2 kDa). As polymer molecular weight decreases, the polymer concentration required to induce depletion aggregation of a given number of cells increases (12, 14). Thus, PEG 2 kDa does not promote depletion aggregation at 30% w/vol (14). Dissolving PEG 2 kDa into wild-type *P. aeruginosa* supernatants did not affect *S. aureus* inhibition in supernatants collected from (A) wild-type or (B)  $\Delta$ *lasR/rhlR* overnight cultures compared to polymer-free controls, indicating that PEG did not inactivate antimicrobials present in *P. aeruginosa* supernatants.

175

176

177 **Depletion aggregation promotes contact-dependent bacterial antagonism.** In addition to  
178 secreted factors, *P. aeruginosa* and other bacteria also possess competitive mechanisms that  
179 depend upon cell-to-cell contact. One mechanism is type VI secretion (TSS) in which a needle-  
180 like apparatus delivers toxins into neighboring cells (46). Our finding that depletion aggregation  
181 causes like-shaped bacterial cells intermix in aggregates led us to hypothesize that it would  
182 promote TSS-mediated bacterial antagonism.

183

184 To test this, we mixed *P. aeruginosa* which capable of T6SS with *Burkholderia thailandensis*, a  
185 TSS-susceptible rod-shaped Gram-negative bacterium (47). In dispersed conditions, no *P.*  
186 *aeruginosa*-*B. thailandensis* antagonism was apparent over 24 hours, as the ratio *P. aeruginosa*  
187 to *B. thailandensis* remained unchanged (Fig 5A). In contrast, *P. aeruginosa* outcompeted *B.*  
188 *thailandensis* in depletion aggregates as measured by viable counts (Fig 5A) and visually

189 assessing differentially-labeled species (**Fig 5B**). Notably the competitive advantage of *P.*  
190 *aeruginosa* was eliminated by genetically inactivating TSS (i.e. PAO1  $\Delta clpV1$  (**Fig 5C**)). Taken  
191 together, these results demonstrate that depletion aggregation can facilitate contact-dependent  
192 mechanisms of bacterial antagonism.  
193

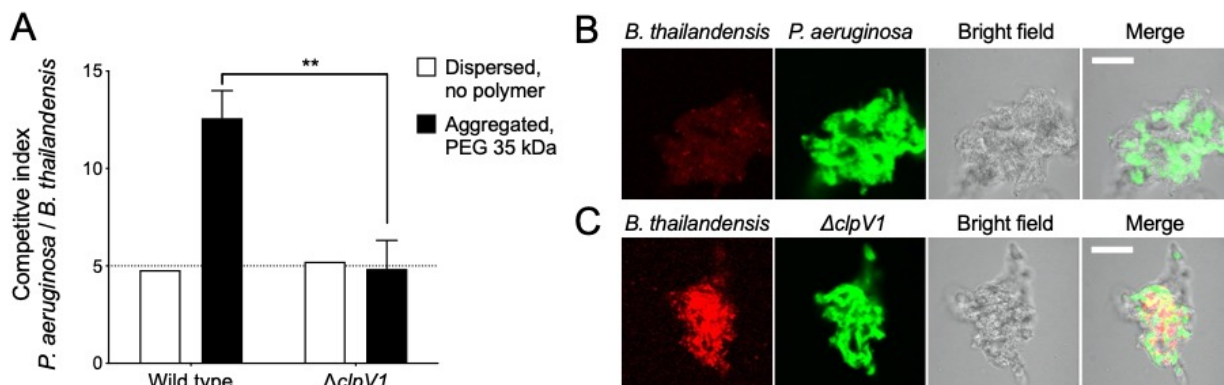

**Figure 5. Depletion aggregation promotes contact-dependent bacterial competition. (A)** The outcome of competitions between *B. thailandensis* and either wild-type or  $\Delta clpV1$  *P. aeruginosa* are shown. Initial cultures contained  $1 \times 10^8$  CFU/ml *P. aeruginosa* and  $2 \times 10^7$  CFU/ml *B. thailandensis*. Results are after 24-h of co-culture in the indicated conditions and are the mean  $\pm$  SD, N=3 for each condition; \*\* $p < 0.01$ . **(B and C)** Fluorescent microscopy was used to visualize depletion aggregates after 24-h of co-culture with 30% PEG 35 kDa. Representative images are shown with *B. thailandensis* strains in red and *P. aeruginosa* in green. Scale bar, 30  $\mu$ m.

194

195

## 196 Discussion

197

198 Previous observations by a number of groups has shown that pathogens causing chronic infection  
199 like those in cystic fibrosis and wounds are generally found to be living in aggregates suspended  
200 in polymer-rich secretions, rather than as surface attached biofilms (1, 2, 10, 38, 48-56). Our  
201 previous work shows that physical forces produced by polymers found at infection sites can  
202 cause bacteria to form suspended aggregates by the depletion mechanism, and depletion  
203 aggregation produces disease-relevant phenotypes (14). In this study we found that depletion  
204 aggregation can actuate bridging interactions mediated by two of *P. aeruginosa*'s self-produced  
205 biofilm polysaccharides; cause bacteria with like shapes to arrange together and bacteria with  
206 different shapes to segregate, and has different effects on bacterial competition mechanisms  
207 mediated by secreted factors and cell-to-cell contact.

208



209 Surface attachment is thought to be fundamental to biofilm formation; sensing and adhering to  
210 surfaces induces physiological responses important in biofilm growth, and attachment keeps  
211 nascent biofilm-forming cells from dispersing (from random movement or fluid flows) before the  
212 matrix binds them together (23). Our previous work and current experiments raise the possibility  
213 that the depletion mechanism might serve somewhat similar functions as attachment surfaces.  
214 Previously we found that like surface attachment (57), depletion aggregation can induce stress  
215 responses in *P. aeruginosa* that mediate antibiotic tolerance (14). Our current experiments show  
216 that depletion aggregation also brings suspended cells together and can promote adhesion by  
217 self-produced polymers. One important caveat is that in the conditions used here,  
218 exopolysaccharide overexpression was required as *P. aeruginosa* PAO1 capable of producing  
219 “wild-type” levels of polysaccharides did not exhibit matrix-mediated adhesion even after long  
220 periods of depletion aggregation. Notably, mutant strains constitutively expressing EPS can be  
221 isolated from infected CF subjects (58), and *in vivo* conditions could induce expression of matrix  
222 polysaccharides to levels needed to cause bridging aggregation.

223  
224 Our findings also have implications for interspecies interactions that may occur in infections.  
225 The experiments showing that depletion aggregation increases tolerance of *S. aureus* to  
226 antimicrobials produced by *P. aeruginosa* (**Fig 6A**) could help explain how *P. aeruginosa* and *S.*  
227 *aureus* can co-exist in chronic infections like wounds and CF lungs, but are difficult to maintain  
228 in liquid co-cultures. While the underlying mechanism remains to be characterized, our previous  
229 work showing that that depletion aggregation induces the SOS stress response (14) raises the  
230 possibility that a similar phenomenon operates in *S. aureus* (59, 60). If general stresses were  
231 induced, aggregated *S. aureus* may exhibit tolerance to other disease-important stresses including  
232 antibiotics.

233  
234 The effect of depletion aggregation to intermix species with similar shapes, and segregate species  
235 dissimilar shapes could have wide ranging effects. One consequence we demonstrated is  
236 enhanced efficacy of TSS-mediated inhibition of rod shaped *Burkholderia sp.* by rod-shaped *P.*  
237 *aeruginosa*, as TSS is dependent upon species intermixing and cell-to-cell contact (**Fig 6B**).  
238 Such interactions could contribute to the ability of *P. aeruginosa* to dominate other rod-shaped  
239 pathogens such as *Haemophilus influenzae* and *Stenotrophomonas maltophilia* (35, 36, 61-63) in

240 CF airways. Depletion aggregation could likewise enhance or inhibit other close-range  
241 mechanisms that depend on contact or have short diffusion distances (like oxidants) depending  
242 on whether species are of similar or dissimilar shapes. In addition, in settings where depletion  
243 aggregation is maintained for long durations (i.e. polymers are continuously present), its effects  
244 on species arrangement could shape co-evolutionary trajectories of species, as the within-  
245 aggregate arrangement of cells likely affects selection, competition, and cell migration.  
246  
247

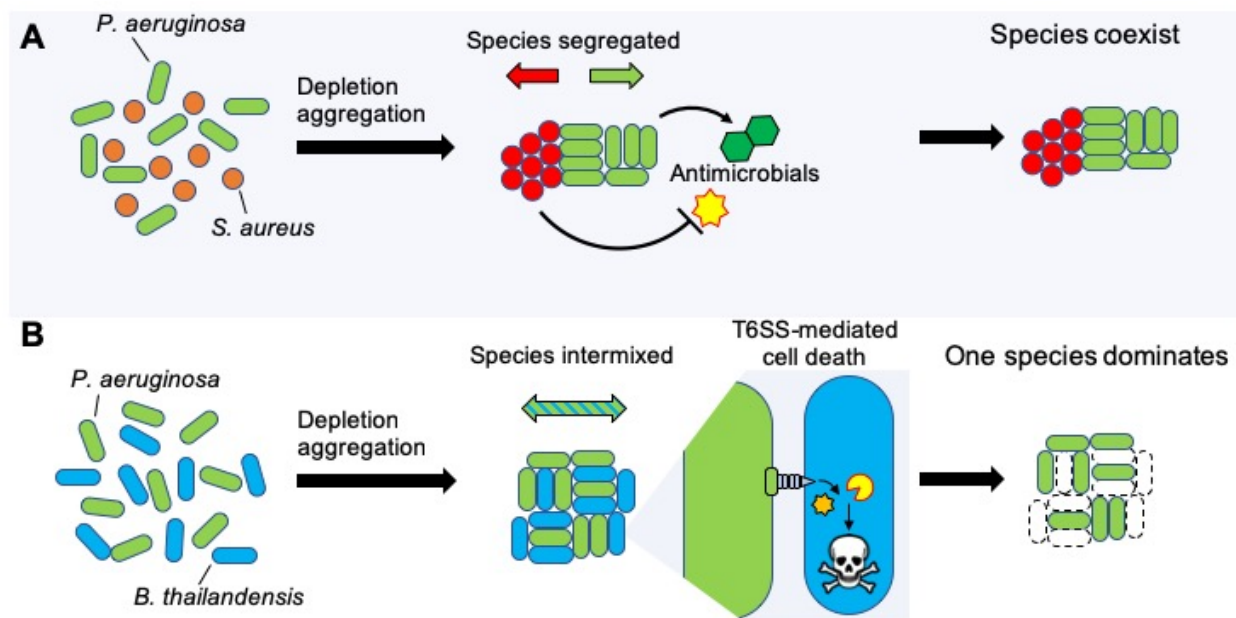

**Figure 6. Model depicting how depletion aggregation affects bacterial competition and species distribution in aggregates. (A)** Depletion aggregation causes bacteria with different cell shapes to spontaneously segregate. When *P. aeruginosa* and *S. aureus* were co-cultured under conditions promoting depletion aggregation, *S. aureus* aggregates tolerated antimicrobials secreted by *P. aeruginosa*, promoting species coexistence. **(B)** When two rod-shaped species such as *P. aeruginosa* and *B. thailandensis* are aggregated by the depletion mechanism, species segregation is not observed and contact-dependent T6SS-mediated killing is promoted, allowing *P. aeruginosa* to dominate.

248  
249  
250 Our study had several limitations. For example, we used a non-biological polymer (PEG) at a  
251 specific concentration (30% w/vol) with a defined molecular weight (PEG 35 kDa) to induce  
252 depletion aggregation as use of a defined polymer limited variability and the transparency of  
253 PEG enhanced microscopy. While it is possible that biological polymers could produce different



254 results, our previous work shows that depletion aggregation by DNA and mucin at  
255 concentrations found at infection sites cause similar aggregate morphology and antibiotic  
256 tolerance phenotypes as PEG (14). We also recognize that varying polymer size and molecular  
257 weight will affect the strength of the aggregating force, and these variables were not examined  
258 here. An additional limitation was that our experiments used laboratory strains and a handful of  
259 *P. aeruginosa* clinical isolates. Clinical isolates with different biological characteristics could  
260 affect depletion-mediated bacteria-bacteria interactions. For example, LPS or other cell envelope  
261 modifications that arise *in vivo* (62) could change cell surface charge or hydrophobicity, which  
262 could affect depletion-mediated bacteria-bacteria or bacteria-polymer interactions.

263  
264 Much research in model systems has been devoted to understanding bacterial sensing and  
265 signaling pathways, purpose-evolved genetic programs, and quasi-social cooperation that shape  
266 bacterial phenotypes important in chronic infections. The data presented here show that basic  
267 thermodynamic forces inherent to polymer-rich environments can have marked effects on  
268 complex bacterial behaviors including aggregation, stress survival, and interspecies competition.  
269 New strategies to manipulate pathogenesis phenotypes will require understanding the relative  
270 contributions of bacterially-driven processes and mechanisms caused by physical forces in the  
271 environment. Generating such knowledge is challenging as cause-and-effect relationships are  
272 difficult to discern thorough the observational studies possible with human samples, and because  
273 animal models representing chronic infection have been difficult to develop. Ultimately,  
274 understanding may come from studying the effects of interventions that manipulate bacterially-  
275 driven processes or the physical environment present at infection sites.

276 **Acknowledgments**

277 We are grateful to Joseph Mougous for sharing the *clpVI* mutant and *Burkholderia* strains.

278 Funding: NIH grants K22AI125282, R01AI138981, and P20GM103546 to PRS; R01HL141098-

279 01A1 to PKS. Isolates were provided by the Clinical Core of UW's CF Foundation sponsored

280 Research Development Program (SINGH19R0).

281 **Methods**

282 Chemicals/growth media/strains

283 Growth media (Lysogeny broth, LB), polyethylene glycol MW 2,000 and 35,000 Da, and  
 284 antibiotics were purchased from Sigma. Strains and their sources are listed in **Table 2**.

285

286 **Table 2. Strains used in this study.**

| Strain                                                  | Description                                                                     | Source |
|---------------------------------------------------------|---------------------------------------------------------------------------------|--------|
| PAO1                                                    | Wild type                                                                       | (64)   |
| PAO1 $\Delta$ <i>wspF/pslD</i> ;<br>pBAD:: <i>Pel</i>   | Deletion of <i>wspF</i> and <i>pslD</i> ; arabinose-inducible <i>Pel</i> operon | (65)   |
| PAO1 $\Delta$ <i>wspF/pelF</i> ;<br>pBAD:: <i>Psl</i>   | Deletion of <i>wspF</i> and <i>pelF</i> ; arabinose-inducible <i>Psl</i> operon | (26)   |
| MucA22 (PDO300)                                         | A <i>mucA22</i> allele derivative of PAO1 constructed by allelic exchange       | (66)   |
| PAO1 $\Delta$ <i>mucA</i>                               | Contains a truncated <i>mucA</i> allele                                         | (67)   |
| Clinical Isolates                                       | <i>P. aeruginosa</i> clinical isolates from various patients                    | (32)   |
| PAO1 $\Delta$ <i>lasR/rhlR</i>                          | Deletion of <i>lasR</i> and <i>rhlR</i>                                         | (68)   |
| PAO1 $\Delta$ <i>clpV1</i>                              | Deletion of <i>clpV1</i>                                                        | (46)   |
| PAO1 attTn7:: <i>GFP</i>                                | Constitutive expression of GFP                                                  | (69)   |
| PAO1 $\Delta$ <i>clpV1</i> ; attTn7:: <i>GFP</i>        | Deletion of <i>clpV1</i> ; constitutively expressing GFP                        | (47)   |
| PAO1 attTn7:: <i>TFP</i>                                | Constitutive expression of TFP                                                  | (20)   |
| PAO1 attTn7:: <i>YFP</i>                                | Constitutive expression of YFP                                                  | (20)   |
| <i>E. coli</i> pUCP18- <i>mCherry</i>                   | Carries plasmid expressing IPTG-inducible mCherry                               | (70)   |
| <i>B. thailandensis</i> E264                            | Wild type                                                                       | (71)   |
| <i>B. thailandensis</i> E264<br>attTn7:: <i>mCherry</i> | Constitutive expression of mCherry                                              | (47)   |
| <i>B. cenocepacia</i> K56-2<br>attTn7:: <i>GFP</i>      | Constitutive expression of GFP                                                  | (72)   |
| <i>S. aureus</i> SH1000                                 | Wild type                                                                       | (73)   |
| <i>S. aureus</i> pCE-SarA- <i>mCherry</i>               | Constitutive expression of mCherry                                              | (74)   |

287

288 PEG-induced depletion aggregation of bacteria

289 For PEG-induced depletion aggregation, bacteria were added at the indicated densities to either  
 290 LB diluted 4:6 with distilled water or LB diluted with 50% PEG 35 kDa (w/vol) prepared in  
 291 distilled water to ensure that nutrient concentrations were the same in dispersed and aggregated  
 292 conditions. LB was diluted with water or 50% w/vol PEG 35 kDa for all experiments described  
 293 unless noted otherwise. Cultures were then incubated on a roller (60 rpm) at 37°C unless  
 294 indicated otherwise.

295

296 Aggregate reversibility assays

297 The indicated bacterial strains were grown overnight in full-strength LB. One hundred  $\mu$ l of  
298 overnight cultures were used to inoculate 3 ml of LB+PEG 35 kDa. After 18-h of growth, 100  $\mu$ l  
299 of the indicated cultures were removed to a 1.5 ml tube containing 900  $\mu$ l of either 1x PBS or  
300 PBS supplemented with 30% w/vol PEG 35 kDa and vortexed. Imaging was performed on 50  $\mu$ l  
301 culture aliquots pre- and post-dilution using a Leica DM1000 LED microscope by spotting onto  
302 a glass slide. Aggregate dispersal was scored by eye by comparing to undiluted control cultures.

303

304 Bacterial competition assays

305 *S. aureus* SH1000 (73) and *P. aeruginosa* PAO1 (64) were grown overnight at 37°C with  
306 shaking in LB broth. *S. aureus* and *P. aeruginosa* were pelleted and resuspended at  $10^8$  CFU/ml  
307 in fresh LB broth. One hundred  $\mu$ l of each culture was added to 2 ml LB supplemented with  
308 either 30% w/vol PEG (35 kDa or 2 kDa) where indicated. Bacteria were grown in co-culture for  
309 18 h and viable bacteria were enumerated by serial dilution and plating on LB plates. Colony  
310 morphology was used to differentiate *P. aeruginosa* from *S. aureus*.

311

312 For experiments investigating the effects of quorum-regulated antimicrobials on *S. aureus*  
313 killing, *P. aeruginosa* PAO1 or  $\Delta$ lasR/rhlR (68) were grown overnight at 37°C with shaking in  
314 50 ml LB broth in a 250 ml flask. Bacteria were removed by centrifugation (10 minutes, 9,000 x  
315 g) and supernatants were filter sterilized using bottle top vacuum filters with 0.2  $\mu$ m pore size  
316 (Millipore). PEG 2 kDa or 35 kDa was added to these supernatants to a final concentration of  
317 30% w/vol where indicated. *S. aureus* was inoculated into *P. aeruginosa* supernatants at  $10^8$   
318 CFU/ml and cultured for 6 h at 37°C on a roller at 60 rpm. Viable *S. aureus* were enumerated by  
319 serial dilution and plating onto LB agar plates.

320

321 To investigate TSS mediated killing, *P. aeruginosa* PAO1,  $\Delta$ clpVI (46), and *B. thailandensis*  
322 E264 (71) were grown overnight at 37°C with shaking in LB broth. Bacteria were resuspended in  
323 fresh LB at  $10^9$  CFU/ml. One hundred  $\mu$ l containing  $1 \times 10^8$  CFU *P. aeruginosa* PAO1 or  $\Delta$ clpVI  
324 and 100  $\mu$ l containing  $2.0 \times 10^7$  CFU *B. thailandensis* were added to 800  $\mu$ l LB or the indicated  
325 polymer solutions and incubated in co-culture for 24 h at 37°C on a roller at 60 rpm. Viable  
326 bacteria were enumerated by serial dilution and plating on LB plates. Colony morphology was

327 used to differentiate *P. aeruginosa* from *B. thailandensis*. For fluorescent imaging of aggregates,  
328 strains PAO1 or  $\Delta clpVI$  constitutively expressing GFP (PAO1 attTn7::*GFP*, (69)) were co-  
329 cultured with *B. thailandensis* E264 attTn7::*mCherry* for 24 hours (47). Image analysis is  
330 described below.

331

### 332 Fluorescent microscopy

333 *S. aureus* SH1000 carrying the fluorescent reporter pCE-SarA-mCherry (74), *P. aeruginosa*  
334 PAO1 attTn7::*GFP*, PAO1 attTn7::*TFP* (20), PAO1 attTn7::*YFP* (20), *Escherichia coli* carrying  
335 pUCP18-mCherry (70), *B. cenocepacia* K56-2 attTn7::*GFP* (72) and *B. thailandensis* E264  
336 attTn7::*mCherry* were co-cultured as indicated. Depletion aggregates assembled from dead  
337 bacteria were prepared by washing and resuspending overnight cultures of PAO1 YFP or PAO1  
338 TFP in PBS at a concentration of  $10^9$  CFU/ml. Formaldehyde (16%, Thermo) was added slowly  
339 to bacteria while vortexing to a final concentration of 4% vol/vol. Bacteria were allowed to fix  
340 for 30 minutes with constant mixing to prevent bacteria from clumping. Cells were then  
341 centrifuged for 10 minutes at 9,000 x g, washed twice with PBS, and resuspended in 1 ml PBS.  
342 Complete bacterial killing was confirmed by plating fixed bacteria on LB agar. One hundred  $\mu$ l  
343 of the indicated fixed strains were added to 2 ml PBS or PBS+30% PEG 35 kDa. Bacteria were  
344 incubated in a 37°C in a roller at 60 rpm and visualized at the indicated times using a Zeiss LSM  
345 510 confocal laser-scanning microscope. Image series were processed using Volocity  
346 (Improvision).

## 347 **References**

- 348 1. Bjarnsholt T, Alhede M, Eickhardt-Sorensen SR, Moser C, Kuhl M, Jensen PO, Hoiby N.  
349 2013. The in vivo biofilm. *Trends in microbiology* 21:466-74.
- 350 2. Bay L, Kragh KN, Eickhardt SR, Poulsen SS, Gjerdrum LMR, Ghathian K, Calum H,  
351 Agren MS, Bjarnsholt T. 2018. Bacterial Aggregates Establish at the Edges of Acute  
352 Epidermal Wounds. *Adv Wound Care (New Rochelle)* 7:105-113.
- 353 3. Kragh KN, Alhede M, Jensen PO, Moser C, Scheike T, Jacobsen CS, Seier Poulsen S,  
354 Eickhardt-Sorensen SR, Trostrup H, Christoffersen L, Hougen HP, Rickelt LF, Kuhl M,  
355 Hoiby N, Bjarnsholt T. 2014. Polymorphonuclear leukocytes restrict growth of  
356 *Pseudomonas aeruginosa* in the lungs of cystic fibrosis patients. *Infect Immun* 82:4477-  
357 86.
- 358 4. Hall-Stoodley L, Costerton JW, Stoodley P. 2004. Bacterial biofilms: from the natural  
359 environment to infectious diseases. *Nature reviews Microbiology* 2:95-108.
- 360 5. Stewart PS, Costerton JW. 2001. Antibiotic resistance of bacteria in biofilms. *Lancet*  
361 358:135-8.
- 362 6. Drenkard E, Ausubel FM. 2002. *Pseudomonas* biofilm formation and antibiotic resistance  
363 are linked to phenotypic variation. *Nature* 416:740-3.
- 364 7. Alhede M, Kragh KN, Qvortrup K, Allesen-Holm M, van Gennip M, Christensen LD,  
365 Jensen PO, Nielsen AK, Parsek M, Wozniak D, Molin S, Tolker-Nielsen T, Hoiby N,  
366 Givskov M, Bjarnsholt T. 2011. Phenotypes of non-attached *Pseudomonas aeruginosa*  
367 aggregates resemble surface attached biofilm. *PloS one* 6:e27943.
- 368 8. Hoffman LR, Deziel E, D'Argenio DA, Lepine F, Emerson J, McNamara S, Gibson RL,  
369 Ramsey BW, Miller SI. 2006. Selection for *Staphylococcus aureus* small-colony variants



- 370 due to growth in the presence of *Pseudomonas aeruginosa*. Proceedings of the National  
371 Academy of Sciences of the United States of America 103:19890-5.
- 372 9. Kharazmi A. 1991. Mechanisms involved in the evasion of the host defence by  
373 *Pseudomonas aeruginosa*. Immunol Lett 30:201-5.
- 374 10. Sonderholm M, Kragh KN, Koren K, Jakobsen TH, Darch SE, Alhede M, Jensen PO,  
375 Whiteley M, Kuhl M, Bjarnsholt T. 2017. *Pseudomonas aeruginosa* Aggregate Formation  
376 in an Alginate Bead Model System Exhibits In Vivo-Like Characteristics. Appl Environ  
377 Microbiol 83.
- 378 11. Marenduzzo D, Finan K, Cook PR. 2006. The depletion attraction: an underappreciated  
379 force driving cellular organization. The Journal of cell biology 175:681-6.
- 380 12. Poon WCK. 2002. The physics of a model colloid-polymer mixture. Journal of Physics-  
381 Condensed Matter 14:R859-R880.
- 382 13. Asakura S, Oosawa F. 1958. Interaction between Particles Suspended in Solutions of  
383 Macromolecules. Journal of Polymer Science 33:183-192.
- 384 14. Secor PR, Michaels LA, Ratjen A, Jennings LK, Singh PK. 2018. Entropically driven  
385 aggregation of bacteria by host polymers promotes antibiotic tolerance in *Pseudomonas*  
386 *aeruginosa*. Proc Natl Acad Sci U S A doi:10.1073/pnas.1806005115.
- 387 15. Clark RAF. 1996. The molecular and cellular biology of wound repair, 2nd ed. Plenum  
388 Press, New York.
- 389 16. Dorken G, Ferguson GP, French CE, Poon WCK. 2012. Aggregation by depletion  
390 attraction in cultures of bacteria producing exopolysaccharide. Journal of the Royal  
391 Society Interface 9:3490-3502.

- 392 17. Schwarz-Linek J, Winkler A, Wilson LG, Pham NT, Schilling T, Poon WCK. 2010.  
393 Polymer-induced phase separation in Escherichia coli suspensions. *Soft Matter* 6:4540-  
394 4549.
- 395 18. Schwarz-Linek J, Dorken G, Winkler A, Wilson LG, Pham NT, French CE, Schilling T,  
396 Poon WCK. 2010. Polymer-induced phase separation in suspensions of bacteria. *Epl* 89.
- 397 19. Armbruster CR, Lee CK, Parker-Gilham J, de Anda J, Xia A, Zhao K, Murakami K,  
398 Tseng BS, Hoffman LR, Jin F, Harwood CS, Wong GC, Parsek MR. 2019. Heterogeneity  
399 in surface sensing suggests a division of labor in *Pseudomonas aeruginosa* populations.  
400 *Elife* 8.
- 401 20. Zhao K, Tseng BS, Beckerman B, Jin F, Gibiansky ML, Harrison JJ, Luijten E, Parsek  
402 MR, Wong GC. 2013. Psl trails guide exploration and microcolony formation in  
403 *Pseudomonas aeruginosa* biofilms. *Nature* 497:388-91.
- 404 21. Bernier SP, Ha DG, Khan W, Merritt JH, O'Toole GA. 2011. Modulation of  
405 *Pseudomonas aeruginosa* surface-associated group behaviors by individual amino acids  
406 through c-di-GMP signaling. *Research in microbiology* 162:680-8.
- 407 22. Palmer J, Flint S, Brooks J. 2007. Bacterial cell attachment, the beginning of a biofilm. *J*  
408 *Ind Microbiol Biotechnol* 34:577-88.
- 409 23. O'Toole G, Kaplan HB, Kolter R. 2000. Biofilm formation as microbial development.  
410 *Annu Rev Microbiol* 54:49-79.
- 411 24. Davey ME, O'Toole G A. 2000. Microbial biofilms: from ecology to molecular genetics.  
412 *Microbiol Mol Biol Rev* 64:847-67.
- 413 25. Costerton JW, Lewandowski Z, Caldwell DE, Korber DR, Lappin-Scott HM. 1995.  
414 *Microbial biofilms*. *Annu Rev Microbiol* 49:711-45.

- 415 26. Jennings LK, Storek KM, Ledvina HE, Coulon C, Marmont LS, Sadovskaya I, Secor PR,  
416 Tseng BS, Scian M, Filloux A, Wozniak DJ, Howell PL, Parsek MR. 2015. Pel is a  
417 cationic exopolysaccharide that cross-links extracellular DNA in the *Pseudomonas*  
418 *aeruginosa* biofilm matrix. *Proc Natl Acad Sci U S A* 112:11353-8.
- 419 27. Byrd MS, Sadovskaya I, Vinogradov E, Lu H, Sprinkle AB, Richardson SH, Ma L,  
420 Ralston B, Parsek MR, Anderson EM, Lam JS, Wozniak DJ. 2009. Genetic and  
421 biochemical analyses of the *Pseudomonas aeruginosa* Psl exopolysaccharide reveal  
422 overlapping roles for polysaccharide synthesis enzymes in Psl and LPS production.  
423 *Molecular microbiology* 73:622-38.
- 424 28. Gibson RL, Burns JL, Ramsey BW. 2003. Pathophysiology and management of  
425 pulmonary infections in cystic fibrosis. *American journal of respiratory and critical care*  
426 *medicine* 168:918-51.
- 427 29. Pedersen SS, Hoiby N, Espersen F, Koch C. 1992. Role of alginate in infection with  
428 mucoid *Pseudomonas aeruginosa* in cystic fibrosis. *Thorax* 47:6-13.
- 429 30. Colvin KM, Irie Y, Tart CS, Urbano R, Whitney JC, Ryder C, Howell PL, Wozniak DJ,  
430 Parsek MR. 2012. The Pel and Psl polysaccharides provide *Pseudomonas aeruginosa*  
431 structural redundancy within the biofilm matrix. *Environmental microbiology* 14:1913-  
432 28.
- 433 31. Wiens JR, Vasil AI, Schurr MJ, Vasil ML. 2014. Iron-regulated expression of alginate  
434 production, mucoid phenotype, and biofilm formation by *Pseudomonas aeruginosa*. *mBio*  
435 5:e01010-13.
- 436 32. Smith EE, Buckley DG, Wu Z, Saenphimmachak C, Hoffman LR, D'Argenio DA, Miller  
437 SI, Ramsey BW, Speert DP, Moskowitz SM, Burns JL, Kaul R, Olson MV. 2006.

- 438 Genetic adaptation by *Pseudomonas aeruginosa* to the airways of cystic fibrosis patients.  
439 Proceedings of the National Academy of Sciences of the United States of America  
440 103:8487-92.
- 441 33. Haussler S, Ziegler I, Lottel A, von Gotz F, Rohde M, Wehmhohner D, Saravanamuthu  
442 S, Tummler B, Steinmetz I. 2003. Highly adherent small-colony variants of *Pseudomonas*  
443 *aeruginosa* in cystic fibrosis lung infection. *Journal of medical microbiology* 52:295-301.
- 444 34. Adams M, Dogic Z, Keller SL, Fraden S. 1998. Entropically driven microphase  
445 transitions in mixtures of colloidal rods and spheres. *Nature* 393:349-352.
- 446 35. Harrison F. 2007. Microbial ecology of the cystic fibrosis lung. *Microbiology* 153:917-  
447 923.
- 448 36. Hauser AR, Jain M, Bar-Meir M, McColley SA. 2011. Clinical significance of microbial  
449 infection and adaptation in cystic fibrosis. *Clin Microbiol Rev* 24:29-70.
- 450 37. DeLeon S, Clinton A, Fowler H, Everett J, Horswill AR, Rumbaugh KP. 2014.  
451 Synergistic interactions of *Pseudomonas aeruginosa* and *Staphylococcus aureus* in an in  
452 vitro wound model. *Infect Immun* 82:4718-28.
- 453 38. Kirketerp-Moller K, Jensen PO, Fazli M, Madsen KG, Pedersen J, Moser C, Tolker-  
454 Nielsen T, Hoiby N, Givskov M, Bjarnsholt T. 2008. Distribution, organization, and  
455 ecology of bacteria in chronic wounds. *J Clin Microbiol* 46:2717-22.
- 456 39. Deziel E, Lepine F, Milot S, He J, Mindrinos MN, Tompkins RG, Rahme LG. 2004.  
457 Analysis of *Pseudomonas aeruginosa* 4-hydroxy-2-alkylquinolines (HAQs) reveals a role  
458 for 4-hydroxy-2-heptylquinoline in cell-to-cell communication. Proceedings of the  
459 National Academy of Sciences of the United States of America 101:1339-44.

- 460 40. Mashburn LM, Jett AM, Akins DR, Whiteley M. 2005. Staphylococcus aureus serves as  
461 an iron source for Pseudomonas aeruginosa during in vivo coculture. Journal of  
462 bacteriology 187:554-66.
- 463 41. Mavrodi DV, Bonsall RF, Delaney SM, Soule MJ, Phillips G, Thomashow LS. 2001.  
464 Functional analysis of genes for biosynthesis of pyocyanin and phenazine-1-carboxamide  
465 from Pseudomonas aeruginosa PAO1. Journal of bacteriology 183:6454-65.
- 466 42. Schuster M, Greenberg EP. 2006. A network of networks: quorum-sensing gene  
467 regulation in Pseudomonas aeruginosa. International journal of medical microbiology :  
468 IJMM 296:73-81.
- 469 43. Palmer KL, Mashburn LM, Singh PK, Whiteley M. 2005. Cystic fibrosis sputum  
470 supports growth and cues key aspects of Pseudomonas aeruginosa physiology. Journal of  
471 bacteriology 187:5267-77.
- 472 44. Haaber J, Cohn MT, Frees D, Andersen TJ, Ingmer H. 2012. Planktonic aggregates of  
473 Staphylococcus aureus protect against common antibiotics. PLoS One 7:e41075.
- 474 45. Staudinger BJ, Muller JF, Halldorsson S, Boles B, Angermeyer A, Nguyen D, Rosen H,  
475 Baldursson O, Gottfrethsson M, Guethmundsson GH, Singh PK. 2014. Conditions  
476 Associated with the Cystic Fibrosis Defect Promote Chronic Pseudomonas aeruginosa  
477 Infection. American journal of respiratory and critical care medicine 189:812-24.
- 478 46. Mougous JD, Cuff ME, Raunser S, Shen A, Zhou M, Gifford CA, Goodman AL,  
479 Joachimiak G, Ordonez CL, Lory S, Walz T, Joachimiak A, Mekalanos JJ. 2006. A  
480 virulence locus of Pseudomonas aeruginosa encodes a protein secretion apparatus.  
481 Science 312:1526-30.

- 482 47. LeRoux M, De Leon JA, Kuwada NJ, Russell AB, Pinto-Santini D, Hood RD, Agnello  
483 DM, Robertson SM, Wiggins PA, Mougous JD. 2012. Quantitative single-cell  
484 characterization of bacterial interactions reveals type VI secretion is a double-edged  
485 sword. *Proceedings of the National Academy of Sciences of the United States of America*  
486 109:19804-9.
- 487 48. DePas WH, Starwalt-Lee R, Van Sambeek L, Kumar SR, Gradinaru V, Newman DK.  
488 2016. Exposing the Three-Dimensional Biogeography and Metabolic States of Pathogens  
489 in Cystic Fibrosis Sputum via Hydrogel Embedding, Clearing, and rRNA Labeling. *mBio*  
490 7:e00796-16.
- 491 49. Worlitzsch D, Tarran R, Ulrich M, Schwab U, Cekici A, Meyer KC, Birrer P, Bellon G,  
492 Berger J, Weiss T, Botzenhart K, Yankaskas JR, Randell S, Boucher RC, Doring G.  
493 2002. Effects of reduced mucus oxygen concentration in airway *Pseudomonas* infections  
494 of cystic fibrosis patients. *J Clin Invest* 109:317-25.
- 495 50. Costerton JW, Lewandowski Z, Caldwell DE, Korber DR, Lappin-Scott HM. 1995.  
496 Microbial biofilms. *Annual review of microbiology* 49:711-45.
- 497 51. Singh PK, Schaefer AL, Parsek MR, Moninger TO, Welsh MJ, Greenberg EP. 2000.  
498 Quorum-sensing signals indicate that cystic fibrosis lungs are infected with bacterial  
499 biofilms. *Nature* 407:762-4.
- 500 52. Bjarnsholt T, Jensen PO, Fiandaca MJ, Pedersen J, Hansen CR, Andersen CB, Pressler T,  
501 Givskov M, Hoiby N. 2009. *Pseudomonas aeruginosa* biofilms in the respiratory tract of  
502 cystic fibrosis patients. *Pediatric pulmonology* 44:547-58.
- 503 53. Fazli M, Bjarnsholt T, Kirketerp-Moller K, Jorgensen B, Andersen AS, Krogfelt KA,  
504 Givskov M, Tolker-Nielsen T. 2009. Nonrandom distribution of *Pseudomonas aeruginosa*



- 505 and *Staphylococcus aureus* in chronic wounds. *Journal of clinical microbiology* 47:4084-  
506 9.
- 507 54. Kim D, Barraza JP, Arthur RA, Hara A, Lewis K, Liu Y, Scisci EL, Hajishengallis E,  
508 Whiteley M, Koo H. 2020. Spatial mapping of polymicrobial communities reveals a  
509 precise biogeography associated with human dental caries. *Proc Natl Acad Sci U S A*  
510 117:12375-12386.
- 511 55. Stacy A, McNally L, Darch SE, Brown SP, Whiteley M. 2016. The biogeography of  
512 polymicrobial infection. *Nature reviews Microbiology* 14:93-105.
- 513 56. Jennings LK, Dreifus JE, Reichhardt C, Storek KM, Secor PR, Wozniak DJ, Hisert KB,  
514 Parsek MR. 2021. *Pseudomonas aeruginosa* aggregates in cystic fibrosis sputum produce  
515 exopolysaccharides that likely impede current therapies. *Cell Rep* 34:108782.
- 516 57. Wood LF, Ohman DE. 2009. Use of cell wall stress to characterize sigma 22 (AlgT/U)  
517 activation by regulated proteolysis and its regulon in *Pseudomonas aeruginosa*. *Mol*  
518 *Microbiol* 72:183-201.
- 519 58. Starkey M, Hickman JH, Ma L, Zhang N, De Long S, Hinz A, Palacios S, Manoil C,  
520 Kirisits MJ, Starner TD, Wozniak DJ, Harwood CS, Parsek MR. 2009. *Pseudomonas*  
521 *aeruginosa* rugose small-colony variants have adaptations that likely promote persistence  
522 in the cystic fibrosis lung. *Journal of bacteriology* 191:3492-503.
- 523 59. Gardete S, Wu SW, Gill S, Tomasz A. 2006. Role of VraSR in antibiotic resistance and  
524 antibiotic-induced stress response in *Staphylococcus aureus*. *Antimicrob Agents*  
525 *Chemother* 50:3424-34.
- 526 60. Anderson KL, Roberts C, Disz T, Vonstein V, Hwang K, Overbeek R, Olson PD, Projan  
527 SJ, Dunman PM. 2006. Characterization of the *Staphylococcus aureus* heat shock, cold

- 528 shock, stringent, and SOS responses and their effects on log-phase mRNA turnover. *J*  
529 *Bacteriol* 188:6739-56.
- 530 61. Coutinho HD, Falcao-Silva VS, Goncalves GF. 2008. Pulmonary bacterial pathogens in  
531 cystic fibrosis patients and antibiotic therapy: a tool for the health workers. *Int Arch Med*  
532 1:24.
- 533 62. Jorth P, Staudinger BJ, Wu X, Hisert KB, Hayden H, Garudathri J, Harding CL, Radey  
534 MC, Rezayat A, Bautista G, Berrington WR, Goddard AF, Zheng C, Angermeyer A,  
535 Brittnacher MJ, Kitzman J, Shendure J, Fligner CL, Mittler J, Aitken ML, Manoil C,  
536 Bruce JE, Yahr TL, Singh PK. 2015. Regional Isolation Drives Bacterial Diversification  
537 within Cystic Fibrosis Lungs. *Cell host & microbe* 18:307-19.
- 538 63. Schwab U, Abdullah LH, Perlmutter OS, Albert D, Davis CW, Arnold RR, Yankaskas JR,  
539 Gilligan P, Neubauer H, Randell SH, Boucher RC. 2014. Localization of *Burkholderia*  
540 *cepacia* complex bacteria in cystic fibrosis lungs and interactions with *Pseudomonas*  
541 *aeruginosa* in hypoxic mucus. *Infect Immun* 82:4729-45.
- 542 64. Holloway BW, Krishnapillai V, Morgan AF. 1979. Chromosomal genetics of  
543 *Pseudomonas*. *Microbiological reviews* 43:73-102.
- 544 65. Colvin KM, Alnabelseya N, Baker P, Whitney JC, Howell PL, Parsek MR. 2013. PelA  
545 deacetylase activity is required for Pel polysaccharide synthesis in *Pseudomonas*  
546 *aeruginosa*. *Journal of bacteriology* 195:2329-39.
- 547 66. Mathee K, Ciofu O, Sternberg C, Lindum PW, Campbell JIA, Jensen P, Johnsen AH,  
548 Givskov M, Ohman DE, Soren M, Hoiby N, Kharazmi A. 1999. Mucoid conversion of  
549 *Pseudomonas aeruginosa* by hydrogen peroxide: a mechanism for virulence activation in  
550 the cystic fibrosis lung. *Microbiology* 145 ( Pt 6):1349-1357.

- 551 67. Pritchett CL, Little AS, Okkotsu Y, Frisk A, Cody WL, Covey CR, Schurr MJ. 2015.  
552 Expression analysis of the *Pseudomonas aeruginosa* AlgZR two-component regulatory  
553 system. *J Bacteriol* 197:736-48.
- 554 68. Siehnel R, Traxler B, An DD, Parsek MR, Schaefer AL, Singh PK. 2010. A unique  
555 regulator controls the activation threshold of quorum-regulated genes in *Pseudomonas*  
556 *aeruginosa*. *Proceedings of the National Academy of Sciences of the United States of*  
557 *America* 107:7916-21.
- 558 69. Choi KH, Schweizer HP. 2006. mini-Tn7 insertion in bacteria with single attTn7 sites:  
559 example *Pseudomonas aeruginosa*. *Nature protocols* 1:153-61.
- 560 70. Irie Y, Borlee BR, O'Connor JR, Hill PJ, Harwood CS, Wozniak DJ, Parsek MR. 2012.  
561 Self-produced exopolysaccharide is a signal that stimulates biofilm formation in  
562 *Pseudomonas aeruginosa*. *Proceedings of the National Academy of Sciences of the*  
563 *United States of America* 109:20632-6.
- 564 71. Yu Y, Kim HS, Chua HH, Lin CH, Sim SH, Lin D, Derr A, Engels R, DeShazer D,  
565 Birren B, Nierman WC, Tan P. 2006. Genomic patterns of pathogen evolution revealed  
566 by comparison of *Burkholderia pseudomallei*, the causative agent of melioidosis, to  
567 avirulent *Burkholderia thailandensis*. *BMC microbiology* 6:46.
- 568 72. Varga JJ, Losada L, Zelazny AM, Kim M, McCorrison J, Brinkac L, Sampaio EP,  
569 Greenberg DE, Singh I, Heiner C, Ashby M, Nierman WC, Holland SM, Goldberg JB.  
570 2013. Draft Genome Sequences of *Burkholderia cenocepacia* ET12 Lineage Strains K56-  
571 2 and BC7. *Genome Announc* 1.
- 572 73. Horsburgh MJ, Aish JL, White IJ, Shaw L, Lithgow JK, Foster SJ. 2002. sigmaB  
573 modulates virulence determinant expression and stress resistance: characterization of a

574 functional rsbU strain derived from Staphylococcus aureus 8325-4. Journal of  
575 bacteriology 184:5457-67.

576 74. Malone CL, Boles BR, Lauderdale KJ, Thoendel M, Kavanaugh JS, Horswill AR. 2009.  
577 Fluorescent reporters for Staphylococcus aureus. Journal of microbiological methods  
578 77:251-60.

579  
580

581 **Legends**

582 **Figure 1.** Depletion aggregation is an entropic mechanism that operates to aggregate  
583 bacterial cells in environments crowded with non-adsorbing polymers. **(A)** Bacterial cells (green)  
584 are suspended in an environment with high concentrations of non-adsorbing polymer (circles).  
585 **(B)** Polymers in between cells are restricted in their conformational freedom and spontaneously  
586 move out from in between cells (black arrows), increasing their entropy. The polymer  
587 concentration gradient across the cells produces an osmotic imbalance (blue arrows). **(C)** The  
588 osmotic imbalance (i.e., the depletion force) physically holds the cells together in aggregates. **(D)**  
589 Representative image of a *P. aeruginosa* PAO1 depletion aggregate with PEG 35 kDa as the  
590 polymer.

591  
592 **Figure 2. Depletion aggregate dispersal phenotypes of *P. aeruginosa* laboratory strains**  
593 **and CF clinical isolates.** (A-F) Aggregate dispersal of the indicated strain and isolates was  
594 measured. Depletion aggregation was induced with 30% w/vol PEG 35 kDa for 18 hours.  
595 Depletion aggregates were then diluted 10X with PBS and representative images were acquired  
596 immediately pre- and immediately post-dilution. See also Figure S1 and Movie S1. Scale bar 40  
597  $\mu\text{m}$ .

598  
599 **Figure S1.** Depletion aggregation was induced with 30% w/vol PEG 35 kDa for 18 hours. *P.*  
600 *aeruginosa* PAO1 depletion aggregates were then diluted 10X with additional PEG 35 kDa.  
601 Scale bar 40  $\mu\text{m}$ .

602  
603 **Figure 3. Depletion aggregation spontaneously segregates bacteria with different cell**  
604 **shapes.** Equal numbers of the indicated species were mixed prior to the addition of PEG 35 kDa  
605 to induce depletion aggregation. Aggregates were imaged 18-h later. Combinations of rod- and  
606 cocci-shaped bacteria are shown in **(A and B)** and combinations of rod-shaped bacteria are  
607 shown in **(C and D)**. Scale bar 30  $\mu\text{m}$ .

608  
609 **Figure S2. Depletion aggregation operates on dead cells and inert latex beads. (A and C)**  
610 Depletion aggregation was induced with PEG 35 kDa using combinations of dead formalin-fixed  
611 cocci and rods. Fluorescent microscopy was used to image aggregates after 18-h of growth. Note

612 species segregation in B (rod+cocci) but not in C (rod+rod). Bar, 30  $\mu\text{m}$ . **(B)** *P. aeruginosa* (rod,  
613 white arrows) and fluorescent spherical latex beads (2  $\mu\text{m}$  diameter, black arrows) were  
614 aggregated using 30% w/vol PEG 35 kDa for 18-h and imaged using fluorescent and brightfield  
615 microscopy. Bar, 30  $\mu\text{m}$ .

616

617 **Figure 4. Depletion aggregation increases *S. aureus* tolerance to antimicrobials secreted**  
618 **by *P. aeruginosa*.** **(A)** Equal numbers ( $10^7$  CFUs) of *S. aureus* and *P. aeruginosa* (wild-type  
619 PAO1 or  $\Delta\text{lasR}/\text{rhIR}$ ) were cocultured in LB supplemented with 30% w/vol PEG 35 kDa where  
620 indicated. After 18-h, viable bacteria were enumerated by serial dilution and plating and plotting  
621 the competitive index (change [final/initial] in *P. aeruginosa* vs. *S. aureus* CFUs). Results are the  
622 mean  $\pm$  SD, N=3 for each condition; \*\*p<0.01 relative to wild type. **(B and C)** *S. aureus* ( $10^8$   
623 CFU/ml) was added to filter sterilized supernatants collected from wild-type or  $\Delta\text{lasR}/\text{rhIR}$  *P.*  
624 *aeruginosa* overnight cultures supplemented with 30% w/vol PEG 35 kDa where indicated.  
625 Viable *S. aureus* was enumerated by serial dilution and plating at the indicated times. Results are  
626 the mean  $\pm$  SD, N=3 for each condition and timepoint; \*p<0.02.

627

628 **Figure S3. PEG does not inactivate antimicrobials present in *P. aeruginosa***  
629 **supernatants.** One possible explanation for the reduced killing of aggregated *S. aureus* (see Fig  
630 4) was that PEG somehow inactivated antimicrobials present in wild-type *P. aeruginosa*  
631 supernatants. To address this possibility, we used a lower molecular weight PEG (PEG 2 kDa).  
632 As polymer molecular weight decreases, the polymer concentration required to induce depletion  
633 aggregation of a given number of cells increases (12, 14). Thus, PEG 2 kDa does not promote  
634 depletion aggregation at 30% w/vol (14). Dissolving PEG 2 kDa into wild-type *P. aeruginosa*  
635 supernatants **(A)** did not reduce *S. aureus* inhibition compared to polymer-free controls **(B)**,  
636 indicating that PEG did not inactivate antimicrobials present in *P. aeruginosa* supernatants.

637

638 **Figure 5. Depletion aggregation promotes contact-dependent bacterial competition.** **(A)**  
639 The outcome of competitions between *B. thailandensis* and either wild-type or  $\Delta\text{clpVI}$  *P.*  
640 *aeruginosa* are shown. Initial cultures contained  $1 \times 10^8$  CFU/ml *P. aeruginosa* and  $2 \times 10^7$   
641 CFU/ml *B. thailandensis*. Results are after 24-h of co-culture in the indicated conditions and are  
642 the mean  $\pm$  SD, N=3 for each condition; \*\*p<0.01. **(B and C)** Fluorescent microscopy was used

643 to visualize depletion aggregates after 24-h of co-culture with 30% PEG 35 kDa. Representative  
644 images are shown with *B. thailandensis* strains in red and *P. aeruginosa* in green. Scale bar, 30  
645  $\mu\text{m}$ .

646

647 **Figure 6. Model depicting how depletion aggregation affects bacterial competition and**  
648 **species distribution in aggregates. (A)** Depletion aggregation causes bacteria with different cell  
649 shapes to spontaneously segregate. When *P. aeruginosa* and *S. aureus* were co-cultured under  
650 conditions promoting depletion aggregation, *S. aureus* tolerated antimicrobials secreted by *P.*  
651 *aeruginosa*, promoting species coexistence. **(B)** When two rod-shaped species such as *P.*  
652 *aeruginosa* and *B. thailandensis* are aggregated by the depletion mechanism, species segregation  
653 is not observed and contact-dependent T6SS-mediated killing is promoted, allowing *P.*  
654 *aeruginosa* to dominate.
